# Supplementary material for: A Metabolomics-Based Toolbox to Assess and Compare the Metabolic Potential of Unexplored, Difficult-to-Grow Bacteria
Source: Mar Drugs. 2022 Nov 14;20(11):713. doi: 10.3390/md20110713 (PMC9698959; doi:10.3390/md20110713)
Supplement: Supplementary file 1 [file marinedrugs-20-00713-s001.zip › Table ST1.xlsx]

## Sheet: Dereplication known metabolites
feature name	m/z	r.t. (min)	Annotation Level 1	Annotation Level 2	Annotation Level 3
7311	80.9477	1.1682
3936	82.537	1.0759
15471	86.0964	1.3594
1739	91.0544	8.5582
4861	92.0497	6.8088
5693	97.0649	5.3496
1650	98.5361	5.0801
301	98.9843	15.124			Glycolaldehyde
2270	99.0807	5.7454
15761	99.98	1.1455
15142	100.076	3.716
2138	102.055	1.356
872	102.091	1.4033
2545	103.054	3.2847			Phenylethyne
19396	103.568	2.6949
18633	104.04	1.0304
2286	104.053	1.4064
18139	104.07	1.2723			Amilon
84	104.107	1.2512			Choline
14040	105.034	8.9081
14034	105.034	9.7149
14136	105.07	4.1413			styrene
15144	105.07	6.9878			styrene
16223	105.07	8.888
16995	105.07	7.6991			Anmene
8168	105.963	1.0594
2384	107.049	6.7181			Benzadehyde
8253	107.086	5.9658			3-Xylene
1446	107.541	5.0268
2064	107.541	5.6185
1888	109.539	2.767
185	110.009	1.0702
7424	110.097	6.3582
19589	111.044	4.8253
5734	111.081	6.3826
9741	111.081	5.5699
18613	112.028	12.7818
18693	112.028	15.4961
18742	112.028	16.3323
23014	112.028	14.5658
23393	112.028	4.3512
5313	112.028	0.9719
16210	112.04	4.7534			pyrrole-2-carboxylic acid
2525	112.051	1.2877	Cytosine
2649	112.051	2.6582
19991	112.076	2.5724
20421	112.076	6.6575
3223	112.112	5.6734
15126	112.112	1.3229			Quinuclidine
2071	112.112	4.976
3908	112.896	1.1743
1053	113.035	3.8576			Uracil
1337	113.035	1.4054	Uracil
1709	113.035	2.1096			Uracil
2490	113.035	5.7459			Uracil
1463	113.06	2.232			Sorbic Acid
9157	113.06	5.242		DL-Mevalonic acid lactone
2830	113.084	6.8974
23250	113.096	7.1324
20752	114.056	2.3979			4-cyanobutanoate
3981	114.066	1.2444	Creatinine
536	114.091	6.0847		6-Aminocaproic acid
14355	114.091	8.0519
2855	114.128	6.5849
22897	115.037	9.7849
5334	115.037	1.2415
2397	115.087	1.2525			Prolimide
15480	115.123	1.1919			1,4-Diaminocyclohexane
18961	116.049	11.4886		5-Hydroxyindole
829	116.071	1.2986			D-Prolin
1477	116.071	6.0022
62	116.107	1.4064
1978	116.547	5.0422
5000	117.07	8.4908			1H-inden
753	117.091	5.0037
3993	117.139	1.0897			Tetrameen
2645	118.065	8.7309			1H-Indole
3479	118.065	5.6856			1H-Indole
119	118.086	1.3316			L-Phenylalanine
18207	118.086	4.2688			valine
3749	118.087	8.1923
17680	118.087	10.0248
17783	118.123	1.3361			2-Methylcholine
5598	119.07	7.8896
5701	119.07	8.8727
1027	120.045	6.8181		2-Aminobenzamide
16290	120.045	8.608			Carbanil
16126	120.045	3.3433			Carbanil
1274	120.066	1.2183		Homoserine
966	120.081	3.2849		2-Amino-1-phenylethanol
2914	120.081	6.7144			Indoline
2804	120.081	7.6472		2-Amino-1-phenylethanol
2973	120.092	7.5217
3819	121.065	2.07		D-(-)-Erythrose
14695	121.065	6.0326		D-(-)-Erythrose
14934	121.065	6.6256			Phenylacetaldehyde
16036	121.065	7.6663			Phenylacetaldehyde
14927	121.1	5.6213			Mesitylene
10309	121.102	7.2611			3-Ethyltoluene
1240	122.049	2.7879
20087	122.06	6.1792			3-Acetopyridine
7440	122.072	1.24
855	122.097	4.4593		2,6-Xylidine
14579	122.097	8.9117			Phenethylamine
7544	123.044	6.9068		4-Hydroxybenzaldehyde
2633	123.044	8.5485		Benzoic acid
3373	123.044	2.0318		4-Hydroxybenzaldehyde
505	123.055	1.4396		Nicotinamide
2249	123.092	7.2407
1793	124.028	1.9232
746	124.039	1.4063	Nicotinic Acid
22832	124.046	5.077
15956	124.087	15.028
15958	124.087	13.8994			2,5-Dimethylpyrimidin-4-amine
19686	124.087	1.0577			s-Triaminobenzene
15955	124.094	15.1998
15959	124.094	14.342
1713	124.112	3.8661
5520	124.112	6.5427
773	125.058	2.7921
9650	125.06	6.0391
21258	125.071	3.2228			Amidol
1298	125.095	9.4411
2582	125.095	10.7895			2-Cyclohexen-1-one,5-dimethyl-
2103	125.095	7.5249
5145	125.096	5.9628			2,6-Octadiel
14418	125.102	2.7361
9677	125.108	5.2584
560	125.986	3.7023
267	125.987	1.0689
2614	126.092	7.341
5375	126.128	6.3806
15622	126.128	1.3198			1-allylpiperidine
1105	127.037	1.921
17140	127.039	3.894			pyrogallol
14011	127.05	4.0342			Uracil, 1-methyl-
17844	127.05	1.269
2618	127.05	2.4408			thymine
3383	127.05	4.7606			thymine
1220	127.059	5.0191
20028	127.087	1.3937
16556	127.123	1.1093
531	128.019	1.0763
1180	128.107	1.2894
14788	128.107	7.2454
1625	128.107	2.6825
5764	128.107	8.2039
21659	129.055	2.4244
961	129.066	1.4159			5-oxoprolimide
19173	129.091	6.6647
12532	129.102	6.1615			Piperidine-3-Carboxamide
7476	129.139	1.1036
21747	129.536	4.7364
1758	130.008	6.645
3022	130.008	7.865
15894	130.008	9.7129
1798	130.05	1.5337	5-Oxo-D-Proline
3020	130.065	7.849			2-Benzanine
14041	130.065	14.0306
5024	130.065	9.1084			2-Benzanine
11177	130.086	5.5361
218	130.087	1.411	L-Pipecolic acid
7427	130.087	1.9711			N-methylproline
16238	130.087	7.3037
942	130.123	1.4141			2-(ethylamino)-3-methylbutal
16037	130.123	9.0439
5532	130.159	6.4777
22819	131.036	2.2314
2960	131.049	3.2654			Propynophenone
950	131.054	2.7951
16882	131.07	3.7605
15874	131.071	2.2278			4-Hexenoic acid, 3-hydroxy-
6165	131.118	1.1171	N-acetylputrescine
13000	131.962	1.0783
7301	132.045	6.0344
16073	132.066	14.885
16079	132.073	15.1998
14329	132.084	5.2967
19295	132.102	10.1781
256	132.102	1.9094		Norleucine
17645	132.102	7.4852
6292	132.102	1.3727		Isoleucine
14474	132.109	3.7371
1200	133.032	1.4911		L-Methionine
20502	133.05	1.2816
22843	133.052	5.038
22891	133.052	5.5829
7346	133.06	1.253
371	133.086	9.2429
14382	133.118	2.3381
11452	133.134	1.2028			3,3''-Oxydi(propylamine)
933	134.027	1.307			Thioproline
14849	134.06	7.6334			m-Tolylisocyate
1485	134.081	1.2474			3-amino-4-hydroxypentanoic acid
14313	134.097	6.6746			tetrahydroisoquinolin
3029	134.107	6.343
1929	134.582	6.8948
23299	135.102	5.755
15621	136.053	6.4707
262	136.062	1.4108			adenine
1405	136.062	6.0284			adenine
2409	136.062	2.6814			adenine
15303	136.062	6.6421
816	136.064	5.0165
4954	136.075	6.3777		2-phenylacetamide
2630	136.076	2.0233			alpha-Toluamide
17531	136.076	8.9846		2-Phenylacetamide
1138	136.112	6.0691			N,N,3-trimethylaniline
2087	137.046	1.4697		Allopurinol
2302	137.046	2.9627		Allopurinol
2528	137.046	6.2977			Hypoxanthine
3528	137.046	7.017
5335	137.046	5.1959	Hypoxanthine
13552	137.06	8.545		Phenylacetic acid
18477	137.132	14.2978			Sabenene
1803	138.055	6.816	anthranilic acid
4045	138.055	4.3121			3-Amino-2,3-Dihydrobenzoic Acid
5032	138.055	8.361			Vitamin L
6852	138.067	7.2512
15934	138.091	1.9013		Tyramine
3078	138.091	6.619			Tyramine
14342	138.091	4.6117
20423	138.091	8.1384
3504	138.092	5.6446			2-acetylcyclopentane-1-carbonitrile
460	138.128	5.4831
21673	139.039	6.2562			4-HYDROXYBENZOIC ACID
1090	139.05	1.4926	Urocanic acid
475	139.074	5.2006
17447	139.075	6.2213
3554	139.076	8.1879			3,5-Octadiyne-1,8-diol
9876	139.076	2.6141
8307	139.112	10.0052
8987	139.112	7.0406			1-(4-methylidenecyclohexyl)ethan-1-one
10906	139.123	5.661
2332	140.069	1.3701		betaine
9594	140.071	4.3772
2499	140.107	8.1006			4-Ethyl-2,4-hexadienecarboxamide
2827	140.107	7.2249
10885	140.107	5.7279
14403	140.125	2.7196
23226	141.006	1.1342
5437	141.053	3.1882
13718	141.102	1.98			3-(2-Pyrrolidinyl)propemide
1699	141.959	3.6672
11711	141.959	1.0174
3038	142.087	1.8939			Arecaine
8631	142.087	6.005
4205	142.098	1.0856			histidol
20	142.123	1.405
6538	142.123	7.8626
3793	143.073	5.8974
2279	143.082	1.3451	Ectoine
19183	143.107	8.0809
15732	143.118	3.9091
15601	143.155	1.3198
19221	143.552	8.0809
16861	144.044	11.5		1,5-Isoquinolinediol
228	144.044	8.6902		1H-Indole-3-carboxylic acid
16801	144.045	10.8828		Quinoline-2,4-diol
2788	144.048	3.1318			sulfurol
15872	144.063	13.9742
22267	144.065	8.7219
3362	144.066	2.6074		N-Methyl-L-glutamic acid
14046	144.081	14.4415		3-(2-Hydroxyethyl)indole
2413	144.081	5.8979
1750	144.081	7.9091		Tryptamine
2381	144.081	6.4136		Tryptamine
14110	144.081	9.1298
967	144.102	1.4135
640	144.102	2.538			stachydrine
20512	144.102	5.9092
16080	144.102	4.3763
1487	144.138	2.1359
13216	144.138	10.974
17521	144.138	5.5456			5-aminooctal
4406	144.175	9.8613
5667	144.541	6.8506
13049	144.982	1.0783
930	145.061	1.2983		1,6-Anhydro-.beta.-D-glucose
5051	145.065	8.4649		2-Methylcinmic acid
731	145.07	5.0141			alpha-Emtbl
11180	145.07	5.6131
3884	145.076	8.4522			4-Quinolimine
15824	145.097	1.178
5035	145.098	3.0048
6708	145.105	11.1101
4064	145.108	1.3425			Tiformin
2315	145.134	1.2046			4-(3-aminopropylamino)butal
1229	146.06	6.5272		4-Hydroxyquinoline
2465	146.06	8.7512		Indole-3-carboxyaldehyde
4806	146.06	10.6249			1H-indole-3-carbaldehyde
3409	146.06	5.8774		Indole-3-carboxyaldehyde
2058	146.097	6.7078		(R)-(+)-Methcathinone
14232	146.1	6.0765
207	146.118	1.342			2-amino-5-methylhexanoic acid
2735	146.125	5.8571
7316	146.165	1.0421		Spermidine
7455	147.044	8.0554		p-Coumaric acid
3397	147.044	2.0183		p-Coumaric acid
5376	147.055	6.9585			1H-Benzoimidazole-2-Carboxaldehyde
5410	147.065	2.4698		Adipic acid
2379	147.077	1.2441			glutamin
3771	147.113	1.098			L-Lysine
2744	147.115	7.6356
10378	148.04	7.1754
1265	148.043	1.3975			S-Vinylcysteine
1041	148.061	1.2328	N-Methyl-D-aspartic acid
21164	148.076	5.7113
14294	148.076	9.0914		3-METHYL-2-OXINDOLE
13919	148.079	3.6341
2382	148.097	1.4465			Homoserine,O-ethyl-
1245	148.112	7.109		1-Phenylpyrrolidine
18474	148.133	1.9291
517	149.023	16.1749			Phthalic anhydride
5059	149.024	20.7511			Phthalic anhydride
22307	149.024	9.4021			Phthalic anhydride
9043	149.024	12.6323
9119	149.045	8.3671
2620	149.06	16.4273			Vinyl benzoate
14125	149.06	9.7149
2711	149.06	3.2727		Tropic acid
14057	149.06	14.3114			Vinyl benzoate
5393	149.075	6.6007			4-hydroxybutylthiourea
4445	149.129	1.3298
15031	149.628	5.4466
3975	149.953	1.0699
15321	150.044	2.2302
2277	150.058	1.4067		Methionine
10517	150.092	8.4608			Benzenepropamide
2099	150.103	6.1338
8777	150.113	1.1896
3959	151.036	1.0731
17539	151.039	12.0794
5616	151.073	6.4213
212	151.097	9.2409
3339	151.112	11.6042
20144	151.136	6.8554
20126	152.017	7.7387
130	152.057	1.4382			Guanine
3429	152.057	5.7889
1201	152.057	5.2101
2329	152.057	2.9811
15939	152.057	3.5938
5314	152.07	1.3304			Acetamol
17247	152.071	5.4753			Acetamol
8333	152.071	6.4293			N-Phenylglycine
8860	152.107	7.8042			Homoanisylamine
14082	152.107	3.1184
22957	152.107	9.5887
19403	152.118	1.2134
19483	152.118	5.0272
19447	152.605	6.3797
2350	153.041	1.4095	Xanthine
2565	153.041	6.4608		xanthine
2272	153.041	2.0879		Xanthine
16742	153.052	3.7605
342	153.052	2.2326
18752	153.067	6.9128
8259	153.091	7.6248
1717	153.091	6.7875		Azelaic acid
13970	153.127	13.5103
15379	153.128	12.0883
2863	153.133	6.1429
12127	153.139	6.505
2951	154.084	1.939
8511	154.087	7.1368
22119	154.123	3.4323
11992	155.017	10.6921
2090	155.032	2.6322
17529	155.045	1.3128
4254	155.061	10.5715			Benzal-malonitril
11209	155.068	2.5538
7859	155.071	7.5653		(-)-Corey lactone diol
21846	155.073	1.3391
639	155.082	2.7999			cyclo-L-Prolylglycine
15424	155.143	13.2644
2189	155.541	12.3344
7516	155.558	7.2684
22235	156.066	5.234
3374	156.077	1.1709			histidin
3663	156.102	8.2637
10014	156.102	7.0909	N-acetyl-DL-leucine
14073	156.102	2.5677
5276	156.102	1.3441			6-hydroxy-8-methyl-8-azabicyclo[3.2.1]octan-3-one
115	156.138	1.4083
459	156.138	2.1174
6957	156.139	6.4792
15058	156.636	5.732
21837	157.047	1.3146
7552	157.076	5.4119			3-Indoleacetonitrile
18807	157.084	5.7413
11222	157.097	5.3293
1523	157.097	3.3755			3-Isopropylpiperazine-2,5-Dione
20175	157.111	6.5954
12764	157.123	6.9651
7094	157.123	10.6828
20064	157.136	7.7906
5107	157.17	1.1165
9621	157.171	12.3882
5172	158.003	1.0532
5328	158.003	3.1798
3920	158.06	6.5075			4-Formylquinoline
1460	158.081	2.4372			Acetylproline
3030	158.093	1.6995		N-acetylproline
20821	158.118	8.305
697	158.118	4.9054
1077	158.118	5.6987			2-amino-3-cyclopentylpropanoic acid
15113	158.118	7.5667
15769	158.118	6.7828			2-amino-3-cyclopentylpropanoic acid
2656	158.154	5.1293
5407	158.154	6.8389			Isovaleryl Diethylamide
7189	158.154	12.1751
19729	158.19	11.2405
2085	158.963	1.129
2347	159.028	1.8496			Disulfide, ethyl propyl
23251	159.065	8.5621
1509	159.077	1.3357		L-Citrulline
3810	159.092	7.1442			1,5-pthalenediamine
3494	159.092	5.8764			naphthalene-1,5-diamine
6778	159.138	13.6367			nonylate
2294	159.149	1.3306
3540	160.076	4.3213		5-Amino-1-phthol
14339	160.076	6.8563		Serotonin
16151	160.076	11.7168		Serotonin
1413	160.097	1.4765
11165	160.097	6.0123
2733	160.112	7.5883		Pargyline
204	160.133	1.3811
1659	160.576	6.1222
15766	161.03	1.1625
3515	161.071	8.5864		2-hydroxy-6,7-dihydro-5H-cyclopenta[b]pyridine-3-carbonitrile
16173	161.071	6.3923
21679	161.08	4.5438
20855	161.081	5.6178			Monomethyladipate
2317	161.092	1.2863			N-gamma-Acetyldiaminobutyrate
18299	161.092	4.2948			N-Carbamoylvaline
5937	161.096	12.8967			3-Benzylidene-2-butenone
4573	161.096	15.7002			3-Benzylidene-2-butenone
14153	161.108	6.2135		2-(1H-indol-3-yl)ethamine
109	162.055	8.6352		1H-Indole-3-carboxylic acid
15604	162.055	6.6916			Indole-3-Carboxylic Acid
3436	162.059	2.3824			S-Allylcysteine
20227	162.059	1.3843			S-Allylcysteine
16622	162.076	1.2794		DL-2-Methylglutamic acid
3225	162.091	8.056			Tryptophol
13627	162.092	9.0459		3-(2-Hydroxyethyl)indole
16575	162.113	1.2493		L-Carnitine
2811	162.128	5.9039
1657	162.128	7.9096
3394	163.042	6.5062			2-oxo-5-methylthiopentanoate
4011	163.05	6.8686			Benzouracil
155	163.06	1.2459
3746	163.075	9.517
3449	163.076	8.6791			2,8-Decadiene-4,6-diyne-1,10-diol
8240	163.076	15.809		3-(3-Methoxyphenyl)propionic acid
21853	163.09	7.1708
19850	163.133	8.6881
2623	164.071	9.3332			(R)-Indoline-2-Carboxylic Acid
4200	164.071	10.6283
13547	164.093	6.2884			6-Dimethylaminopurine
16363	164.093	4.0907
3294	164.107	7.0974			N-Phenethylacetamide
2412	164.107	5.7466			N-Methyl-N-(Methylbenzyl)formamide
14221	164.107	8.9007		N-(2-phenylethyl)acetamide
23098	164.128	1.1964
5524	164.144	7.2563			Etilamfetamine
4569	164.165	11.5888
365	164.547	12.3383
4346	164.97	1.0516
17557	165.055	8.2488			Coumaric acid
2567	165.055	2.0215		L-Tyrosine
1035	165.089	7.7034
3212	165.089	7.1914
18525	165.127	14.3087
1720	165.127	12.7255			(4Z)-4-ethylidene-3,5,5-trimethylcyclohex-2-en-1-one
5359	166.039	2.4698
3495	166.048	2.6026
2488	166.053	1.2521		Methionine sulfoxide
16342	166.062	5.7945
7512	166.072	1.961
15792	166.085	5.8871
840	166.087	3.2854	L-Phenylalanine
3616	166.087	7.6937		Phenylalanine
2163	166.106	10.519
19520	166.134	1.2915
18981	166.141	8.2142
16087	167.046	5.6642			3-Carbamoylpicolinic Acid
22930	167.068	3.8155
3092	167.107	11.4518			Oxocitral
18428	167.143	14.8093
18485	167.143	12.7407			Dihydrojasmone
1608	167.583	6.278
19523	167.592	5.7292
4090	168.063	2.4965
21619	168.102	1.8454
8601	168.102	5.079
9208	168.102	6.5059
23424	168.102	8.3799
3862	168.138	5.7197
14523	168.138	4.1094
20152	168.174	8.7782
16501	169.047	6.4642
3552	169.047	2.4759
626	169.076	7.618		Norharmane
3867	169.076	8.6455
16737	169.077	10.4149
5653	169.086	7.5919
10314	169.086	9.3956
1218	169.097	4.4864			Cyclo(-D-Ala-L-Pro)
3206	169.097	1.1854	Pyridoxamine
21075	170.022	7.2188
22688	170.034	1.2813
3517	170.06	5.8802
4030	170.071	7.1136
14081	170.081	1.4385			Adermine
188	170.096	14.0692		Diphenylamine
2505	170.118	6.6529
22904	170.118	2.7228
4089	170.118	7.8224			hydroindole
6115	170.118	1.3813
9534	170.118	17.283
19205	170.154	5.2672
3850	170.545	4.7274
23396	171.05	2.7412
1314	171.077	1.4528		Glycyl-L-4-hydroxyproline
673	171.099	6.8249
10769	171.102	5.4301
834	171.113	5.9514		Glycyl-L-norleucine
17878	171.138	18.3965
15418	171.139	12.0883		gamma-Decalactone
12077	171.149	9.6062		3-Cyclohexyl-1,1-dimethylurea
8698	171.186	13.4535
9331	171.561	8.6061
7307	172.037	6.0458
3827	172.058	12.9114
13668	172.058	8.5855
3610	172.058	4.4926
13893	172.058	14.9688
2205	172.097	3.0716
3772	172.097	1.4559
764	172.133	6.4354			2-amino-3-cyclohexylpropanoic acid
955	172.133	1.4218
7208	172.133	17.4712		Gabapentin
7487	172.133	8.6966		2-amino-3-hydroxynonoic acid
2956	172.133	6.9685		2-amino-3-hydroxynonoic acid
5729	172.133	8.0269		Gabapentin
16056	172.134	10.1612
19377	172.169	8.4882
183	172.17	13.3086			Capramide
2476	172.17	6.5479			2-methyl-4-(3-methylpyrrolidin-1-yl)butan-1-ol
820	173.042	1.2543
4084	173.071	6.5826			3-Quinolinecarboxamide
244	173.079	2.785
5603	173.081	8.7166
960	173.082	2.8248
8293	173.129	1.2933			N-(4-acetamidobutyl)acetamide
19056	173.149	8.4738
2290	173.165	1.2875
15415	173.165	1.7941
444	173.552	12.3527
20077	174.037	9.2979
5343	174.039	1.4614
5447	174.055	7.2607			4-Hydroxyquinoline-3-carbaldehyde
15257	174.055	2.5463		Quinoline-4-Carboxylic Acid
10415	174.091	9.6148
14902	174.092	11.3529
14870	174.113	7.4568	N-acetyl-L-Leucine
15353	174.113	2.0059		N5-(1-Iminoethyl)-L-ornithine
16375	174.113	6.3145
17208	174.123	1.4235			N5-(1-Iminoethyl)-L-Ornithine
17214	174.124	2.6773
1775	174.149	1.4136			2-Aminononoic acid
2751	174.149	2.0482
9858	174.149	3.0737
1516	175.018	5.0224
19283	175.035	9.814
4071	175.05	6.3873
1349	175.073	7.0007
1996	175.087	7.5494
1680	175.087	5.4135		Indole-3-Acetamide
2345	175.108	1.3561		N-.alpha.-Acetyl-L-ornithine
15723	175.108	1.9177		Gly-Val
18757	175.133	6.9261			2-Pentoxyethyl acetate
1150	176.052	1.9222
1614	176.053	12.7587
3609	176.053	13.3336
17983	176.053	9.9727
10179	176.059	5.4561
3933	176.07	6.5103		3-Indoleacetic acid
2867	176.071	8.9743		3-Indoleacetic acid
1303	176.071	8.1432			Indole-3-Acetic Acid
2362	176.074	4.8685
2299	176.074	4.0197
14008	176.083	13.5103
282	176.103	1.2734			citrullinate
19444	176.118	6.1454
19605	176.119	6.7177
1686	176.128	1.4957
2311	176.128	5.983			2-amino-7-hydroxyoctanoic acid
4495	176.576	11.1076
18631	177.007	1.0451
4140	177.053	6.0229
8921	177.055	12.6105
1399	177.064	2.7582
21599	177.091	8.6885			2-Phenylpropenyl acetate
12541	177.128	9.1321
22193	177.139	6.8718
15196	177.558	1.6524
2836	178.086	6.0985		(1)-1,2,3,4-Tetrahydroisoquinoline-3-carboxylic acid
13708	178.086	7.2746			5-Hydroxytryptophol
13586	178.087	11.7456			5-Hydroxytryptophol
19448	178.098	5.0532
3395	178.108	1.2019			(2R,3R,4R,6S)-2,6-bis(hydroxymethyl)piperidine-3,4-diol
2727	178.123	6.693			3-(Dimethylamino)propiophenone
13172	178.123	6.0924			N-methyl-N-propan-2-ylbenzamide
524	178.134	6.7285
16058	178.159	7.9826
4530	178.181	12.7419
15079	178.649	5.4466
6532	179.064	8.1245
3712	179.066	8.3027
321	179.068	5.4213
1358	179.068	6.1924
4796	179.079	2.8171
5981	179.105	10.6627
1911	179.105	9.2681
7719	179.143	7.0806			1-(3,5,5-Trimethyl-2-cyclohexen-1-ylidene)acetone
1768	179.558	7.5416
9903	179.576	10.0462
15660	180.002	7.1718
16664	180.048	7.7901
21682	180.055	4.7883
15677	180.063	2.5992
20492	180.066	7.2913			4-Acetamidobenzoic Acid
19227	180.078	1.5499
4081	180.089	5.9314
8228	180.102	5.8311
22054	180.102	7.9377			3-amino-4-phenylbutanoic acid
10220	180.102	4.273
10974	180.102	7.1266		N-acetyltyramine
9734	180.103	11.8269			ethyl 4-(methylamino)benzoate
15188	180.138	13.8396
1311	180.138	5.8104			Methylephedrine
8506	180.139	8.6021
13518	181.024	8.5352
17755	181.047	4.3253
18604	181.052	12.3265
1912	181.076	7.6186
9855	181.084	6.21
9888	181.085	8.3812
9429	181.097	5.4287
8136	181.097	7.2421
1436	181.134	8.333
2113	181.134	7.0561
2686	181.134	5.369
15638	182	7.1718
14676	182.051	11.3376
21928	182.067	2.3239			8-Hydroxy-7-methylguanine
21924	182.068	1.4418		L-Tyrosine
10693	182.079	4.6767
16741	182.08	5.8923
405	182.081	1.4063	L-Tyrosine
17510	182.081	8.6285		L-Tyrosine
1494	182.081	2.0198	L-Tyrosine
22842	182.089	5.0344
16329	182.117	6.4417
3371	182.118	7.8976
1873	182.154	6.4257
2148	182.154	5.5594
9475	182.191	8.4333
4272	182.963	1.0795
965	183.063	5.6458
8862	183.063	1.8668
18332	183.074	4.2688
1957	183.079	6.9897
638	183.092	8.0731		Harmane
1442	183.099	9.8304
360	183.1	5.9534
8563	183.113	7.8609
15420	183.113	1.9763
9368	183.113	9.7077
18408	183.138	14.2978		2-Hexyl-4-pentynoic acid
19057	184.061	2.8822			4-Pyridoxic Acid
684	184.064	1.2754	Phosphocholine
5868	184.097	6.0263
5547	184.108	1.2831		Hydroxysimazine
1019	184.133	6.7516
15313	184.17	6.668
22109	184.17	10.9719
14187	185.071	10.1596			1H-Pyrido[3,4-b]indol-1-one, 2,9-dihydro-
14500	185.071	8.6098
16316	185.079	5.7636
14026	185.089	13.5103
858	185.092	2.2196		cyclo-(Ala-4-hydroxy-Pro)
964	185.093	1.4402		cyclo-(Ala-4-hydroxy-Pro)
74	185.096	12.3323
426	185.115	8.704
12737	185.117	11.4745			6-hydroxydeca-2,4-dienoic acid
15573	185.118	10.1039
1743	185.129	7.1317		L-Alanyl-L-norleucine
18455	185.154	12.7407		gamma-Undecalactone
13875	185.154	14.9369			3-methyldec-3-enoic acid
13908	185.165	1.2135
15978	185.165	5.5771
15049	185.657	5.732
14439	186.089	8.9117
2639	186.113	1.5019
2464	186.113	6.9132			Ecgonine
9926	186.113	4.117
1052	186.118	5.0102
3960	186.124	1.3264
390	186.131	11.1427
1033	186.149	2.6884
20208	186.185	10.8828
11575	186.185	14.3058			N-(undecan-2-ylidene)hydroxylamine
2508	186.186	7.1497
15064	186.221	9.641
7843	186.222	12.8865			dihexylazanium
9130	186.222	11.8335
15272	186.563	1.6524
1224	187.028	2.8044
1286	187.04	3.8305
17566	187.058	1.2519
16544	187.087	9.4226
5558	187.097	7.8117			Dimethyl 2-ethyl-3-methylmaleate
5583	187.097	9.5912			Ethyl itacote
22699	187.108	5.7304
924	187.108	1.3516		Ala-Pro
14141	187.123	7.9925		2-methyl-1,2,3,4-tetrahydropyridino[4,3-b]indole
15419	187.181	2.0806
2760	187.181	1.2741
2495	187.578	4.9357
8400	187.971	5.1804
4418	188.035	1.2416
16047	188.044	5.8206
3116	188.068	3.2802
2201	188.071	7.5536		DL-Indole-3-lactic acid
399	188.071	5.8762		DL-Indole-3-lactic acid
1305	188.092	2.1198
14771	188.108	10.703
8052	188.128	6.2422
679	188.128	1.4182		N6-(1-Iminoethyl)-L-lysine
2807	188.128	1.9519		N6-(1-Iminoethyl)-L-lysine
3581	188.128	8.1909			8-amino-7-oxononoate
21624	188.129	3.0413
2557	188.143	9.4929			3-tert-butyl-4-ethylbenzonitrile
2756	188.144	8.8006
2815	188.144	7.7679		2,3-Dimethylethcathinone
15454	188.165	3.0036
21993	188.165	2.4968
14887	188.165	1.4595
22463	188.201	10.8261			3-Isooctoxyl propylamine
15345	188.652	6.4079
21131	189.043	3.7568
4159	189.066	7.6736			5-nitrophthylamine
12207	189.081	6.5873
19246	189.112	8.0679			Azelaic Acid
1623	189.124	3.6477		Ala-Val
15768	189.124	2.4836			leucylglycine
8553	189.969	5.1804
18897	190.032	11.3324			4-Formyl-2-phenyl-1,3-thiazole
3627	190.032	13.0415
3952	190.05	6.6968	Kynurenic acid
9723	190.085	8.209
17549	190.087	6.548			3-Indolepropionic Acid
2283	190.09	5.807
20107	190.112	18.0167
14150	190.126	5.3354			S-Ethyl Dipropylthiocarbamate
14602	190.159	8.9086
20883	191.068	7.4991
5350	191.085	7.5245
6429	191.086	11.2306			Benzo(def)fluorene
5582	191.091	8.7212
1153	191.092	6.7994
16212	191.118	7.1205
13540	191.143	13.9832
14760	191.143	10.4691
9354	191.18	16.8009
6146	191.18	17.346		Sclareolide
8410	191.18	15.8221		Sclareolide
8923	191.18	14.816		Sclareolide
22691	191.581	11.8668
17577	192.066	10.5534			2-oxindole-3-acetate
19676	192.077	5.2869
13986	192.102	8.3881			Benzomorpholide
727	192.102	6.6948
19703	192.102	5.7303
19643	192.103	4.8971
17753	192.123	1.5205
1024	192.138	7.4643		Bamethane
2624	192.138	6.6496			N,N-Diethylphenylacetamide
3243	192.138	11.4902
22950	192.138	9.59
7645	192.197	13.6615			1,1-Diethoxyhexane
5698	193.047	6.0729
2472	193.05	8.5013
8586	193.084	6.3444
7152	193.084	7.7735
8761	193.095	5.7005
7351	193.095	4.8243
9333	193.101	11.7215			3-methylphenanthrene
6275	193.123	7.5616
9420	193.159	12.5109			alpha-ionone
17552	193.17	7.1722
4887	194.045	9.2703			5,6-Dihydroxy-1H-Indole-2-Carboxylic Acid
17525	194.054	1.3128			metronidazole
19170	194.07	6.6647
10565	194.08	4.3512
20024	194.095	2.6413
634	194.107	5.0134
22859	194.107	6.9085
22866	194.107	5.5959
3640	194.116	8.0992
3623	194.117	6.8797
3404	194.118	6.0276			4-(Diethylamino)Benzoic Acid
22923	194.118	11.0356
6796	194.118	13.341		Ethyl-4-dimethylaminobenzoate
9704	194.118	8.9406
3897	194.118	3.402
13336	194.118	8.3583
22076	194.154	6.0663
8543	194.154	9.8558
13912	194.617	10.9683
5555	195.062	8.6397
17462	195.063	5.1779
9251	195.074	7.9649
989	195.088	1.2519
41	195.088	7.2276	Caffeine (std)
4207	195.092	10.522
8760	195.099	9.5777
9189	195.1	8.963
903	195.113	6.1728			Proline anhydride
278	195.123	5.4649			Tetraglycol
12325	195.15	6.0117
4088	196.037	7.2336
22899	196.064	1.2734
7971	196.097	6.337
21079	196.097	7.9203
2460	196.108	2.6588
15385	196.108	1.4822
13533	196.133	7.9626
2556	196.133	6.6278
2745	196.133	7.4405
9776	196.133	6.0103
15407	196.145	1.1919
1423	196.17	6.2276
8238	196.17	6.8405
7360	196.865	1.188
2432	197.069	5.4016
329	197.079	2.5967	2-Hydroxyphezine
2478	197.079	6.6562
23253	197.09	1.342
2451	197.092	5.7454
8754	197.093	9.3289
13645	197.108	8.6228		Ethylbeta-carboline
408	197.115	6.9364
14821	197.117	8.4263
7677	197.129	8.4897			Cyclo(-Pro-Val)
344	197.129	6.8399		cyclo(L-Val-L-Pro)
10085	197.129	6.0391
13442	197.165	11.1287		Dihydrocarvyl acetate
11667	197.165	6.531			N-cyclohexylpyrrolidinylcarboxamide
15685	197.955	10.5405
1384	198.053	8.1384
21561	198.088	1.3146			N-acetyl-L-histidine
16321	198.092	8.0307			3-Methoxycarbazole
15655	198.097	1.2424
4031	198.103	7.6148			3-Imidazol-1-ylmethyl-1H-indole
9773	198.113	6.1702
4559	198.124	1.2192			Hercynine
22303	198.124	2.1987
11867	198.128	8.3476		Dibenzylamine
5471	198.149	7.9683
21977	198.149	2.4188
8564	198.149	9.6919
9117	198.185	11.7967			2-octylcyclopropanecarboxamide
10126	198.186	14.2179		Azacyclotridecan-2-one
21096	198.618	6.6726
7362	198.862	1.188
23349	199.046	2.1694
5600	199.058	5.5514
716	199.087	7.6009			para-Nitrosodiphenylamine
15294	199.094	2.9999
8093	199.097	6.4768			Methyl 2,2-Dimethyl-4,6-Dioxocyclohexanecarboxylate
8508	199.097	7.0278			3,4-Methylene Suberic Acid
10899	199.108	6.4347
4177	199.108	3.5171		(3S,8aS)-3-[(1R)-1-Hydroxyethyl]hexahydropyrrolo[1,2-a]pyrazine-1,4-dione
4185	199.133	14.5933
4632	199.133	12.1385
4220	199.144	7.136			Cyclo(valylvalyl)
10167	199.169	16.966			Citronellol Acetate
15539	199.17	13.9924
13926	199.17	12.5761		cis-5-Dodecenoic acid
11287	200.074	10.6921		N-Ethyl-p-toluenesulfonamide
2825	200.128	2.0731
14036	200.128	6.1319
5474	200.129	1.3895
3951	200.139	1.3634
5638	200.165	5.289
2587	200.165	2.5373
10319	200.165	10.5122
9845	200.165	1.4214
21526	200.201	7.8202
343	200.201	15.2426			Lauramide
2231	200.201	10.6965
16248	200.212	15.1998
1558	200.237	13.1671
5668	200.973	1.0826
17639	201.003	12.1314
1475	201.044	5.0419
14631	201.048	11.4489			Camalexin
16033	201.065	7.0268
3257	201.075	8.3129
1048	201.087	1.3962
1125	201.102	7.8804
4002	201.103	4.8118
5197	201.11	6.3251
14558	201.124	4.4959
863	201.124	1.4165
4256	201.124	5.843			2-(cyclopentylcarbamoylamino)propanoic Acid
10328	201.124	7.9129
14140	201.139	8.3565			3-Piperidin-4-Yl-1H-Indole
2352	201.16	1.2861
5894	201.185	16.3566		Dodecanoic acid
15593	201.196	1.3198
1081	202.054	1.5981
5767	202.085	6.8946
14653	202.123	6.1025
19486	202.134	1.2915
19654	202.134	8.0688
969	202.144	1.4429
1772	202.144	9.1906			L-Valine, N-(3-methyl-1-oxobutyl)-
631	202.144	2.5195
4455	202.144	3.3072
4674	202.144	4.0664			L-Valine, N-(3-methyl-1-oxobutyl)-
14982	202.159	3.763		alpha-Propylaminopentiophenone
2527	202.159	12.7139		4'-Methyl-N-methylhexanophenone
15523	202.18	3.8842
23102	202.18	1.4044		4-Hydroxy-1-(2-hydroxyethyl)-2,2,6,6-tetramethylpiperidine
23117	202.18	1.9981
22173	202.18	11.2712
14295	202.217	11.8472
18610	202.59	9.4206
3368	203.053	1.2177
19068	203.063	9.7471
18912	203.064	8.1883
5363	203.103	1.3044
20477	203.103	2.346
9543	203.105	11.5812
6284	203.107	15.6868			1-[4-hydroxy-3-(3-methylbuta-1,3-dien-1-yl)phenyl]ethan-1-one
6604	203.107	12.9			1-[4-hydroxy-3-(3-methylbuta-1,3-dien-1-yl)phenyl]ethan-1-one
8113	203.118	7.352
14699	203.118	9.3537		N-[2-(1H-Indol-3-yl)ethyl]acetamide
2594	203.139	6.1265			alanylleucine
11163	203.139	3.5397			alanylleucine
14442	203.14	2.0522			N(6)-Acetonyllysine
15527	203.175	2.0547
4342	204.048	12.3045
5289	204.087	1.2935		N-Acetyl-D-glucosamine
3379	204.1	8.036
19389	204.113	1.369			4-Aminoantipyrine
2184	204.123	6.0962
2232	204.125	7.7952	Isopentenyladenine
8900	204.138	15.0607
12819	204.138	12.0143
14882	204.138	9.6118			Crotamiton
14137	204.14	6.5506
22027	204.142	5.9882
14529	204.159	2.5856
15466	204.16	1.4446
2916	204.175	9.826
2515	204.175	9.1297
13949	205.065	5.3341
3451	205.066	1.5696
3456	205.084	6.6405
8940	205.084	9.1861
9178	205.084	7.9376
1050	205.086	16.1911
11200	205.091	7.8597
8550	205.096	9.719
750	205.097	5.8776		L-Tryptophan
1029	205.097	6.5552		cyclo-(glycinyl-L-phenylalanine)
9848	205.097	8.1993
8730	205.101	11.2274			2-phenyl-phthalene
5535	205.107	7.8117			Diethyl ethoxymalote
1651	205.118	2.2086		Ser-Val
953	205.119	1.3452			2-amino-6-acetamido-5-hydroxyhexanoic acid
1636	205.12	10.4222
16528	205.134	6.2302
2677	205.17	1.6368
20164	205.17	7.2711
5362	205.195	17.6964
8202	205.982	5.1804
958	206.046	1.2892			choline sulfate
17714	206.067	11.463			6-(methylsulfinyl)hexyl isothiocyate
7193	206.08	6.1135
1923	206.085	2.8631			(Ssrc)-S-(3-Pentenyl)-L-Cysteine Sulfoxide
2338	206.113	1.347			2-Amino-6-hydrazinylheptanedioic acid
7428	206.118	9.2233
16115	206.118	10.5258
11174	206.118	8.6023		2-ethyl-1,2,3,4-tetrahydroisoquinoline-3-carboxylic acid
1104	206.118	7.5348		2-ethyl-1,2,3,4-tetrahydroisoquinoline-3-carboxylic acid
19437	206.129	10.0979
19388	206.129	2.6949
19320	206.154	12.2435
3018	206.154	7.3053		Panthenol
22854	207.064	7.4871
19216	207.069	6.7689
18678	207.072	1.0263
3837	207.088	5.5147
8565	207.096	10.0982
2805	207.099	11.4444
7343	207.113	5.8718
2303	207.149	6.3573			Monoethylglycinexylidide
28	207.159	9.2359
5400	207.211	18.5241			(6E)-2,6,11-trimethyldodeca-2,6,10-triene
8183	207.98	5.1804
19172	208.086	8.0679
9309	208.087	5.3883
2765	208.097	5.9709			4-[(3-Methylphenyl)Amino]-4-Oxobutanoic Acid
2526	208.097	4.2434
10846	208.097	6.8886			N-acetyl-L-phenylalanine
5131	208.097	10.0433
2606	208.097	5.1902
3945	208.097	8.0543		N-Acetylphenylalanine
13644	208.133	10.1893
16216	208.134	4.2608
2137	208.17	6.6831
2696	208.17	7.4953
5321	209.06	0.9829
22903	209.06	12.1785
6170	209.079	6.6873
17263	209.079	6.0213
15938	209.092	3.2381		L-Kynurenine
4268	209.092	5.6047
17863	209.092	7.4461			2-(Carbamoylamino)-3-Phenylpropanoic Acid
6810	209.096	15.6075		Chalcone
6926	209.096	14.2301		Chalcone
4000	209.103	1.3071
2715	209.115	8.2287
4142	209.129	2.6075
13496	209.154	13.9832			3-Oxo-7,8-dihydro-.alpha.-ionone
12968	209.154	11.3321
15376	209.165	7.1119
14248	209.166	12.0029
8669	209.19	13.4662			9Z,12E-Tetradecadiel
18594	209.19	16.8364			tetradeca-1,13-dien-3-one
8117	209.202	9.5517
550	209.562	12.3504
5527	210.022	7.5477
14297	210.055	11.4048			Biquidone
5557	210.065	6.8244
1054	210.103	11.6074			Proflavine
3483	210.111	8.2769
13516	210.113	8.9307
20467	210.113	3.3731
2729	210.124	4.7647
19639	210.133	7.6053
16044	210.149	9.518
16302	210.149	6.8537
8187	210.149	8.7371
14540	210.149	5.6571
16134	210.149	7.7275
19285	210.185	10.3601
13615	210.185	14.3168
18971	211.048	9.0982
5739	211.058	8.576
15652	211.074	6.9193
657	211.087	12.0322			1-(9H-beta-carbolin-1-yl)ethanone
18454	211.087	11.1111			1-(9H-beta-carbolin-1-yl)ethanone
23198	211.087	12.6734
5380	211.094	9.0795
2484	211.094	8.078			Acetylagmatine
5706	211.094	7.3445
6991	211.094	6.5133
4227	211.095	5.3187
18230	211.107	5.4276
2497	211.108	6.2616
1107	211.108	4.6749		Pro-Pro
117	211.109	15.1236			2-ethylhexyl acetate
6231	211.112	14.6461		Dihydrochalcone
868	211.123	9.2126		9-Ethyl-9H-carbazol-3-ylamine
15364	211.131	12.0883
8372	211.131	10.8764
4953	211.144	0.9426
250	211.144	8.0156		Cyclo(proline-leucine)
20911	211.144	3.8504
4250	211.147	14.9117			1,3,5,7,9,11,13,15-Hexadecaoctaene
8680	211.169	12.5125
8713	211.206	17.9558			tetradec-1-yn-1-ol
1430	212.053	14.3433
3703	212.082	11.2384			9H-Beta-carboline-1-carboxamide
6357	212.128	8.2652
7905	212.129	6.1446
10073	212.129	7.4544
346	212.143	16.2968			1,3-Diphenylpropan-2-Amine
14199	212.147	8.0386		N-Benzyl-.alpha.-methylbenzylamine
2257	212.165	10.7522
14145	212.238	13.4673
654	213.073	6.7892
4944	213.101	8.1182			1,3-Diphenylurea
23313	213.103	6.1446
12286	213.11	6.0117
8225	213.112	7.5769
2014	213.124	4.0659			Prolylproline
14951	213.124	2.0658		Gly-Pro-Arg-Pro-amide
3315	213.124	5.7778		cyclo-[Val-(4-hydroxy-Pro)]
8358	213.124	6.6114
179	213.146	10.868
8878	213.16	8.1474			cyclo(L-Val-L-Leu)
7569	213.16	8.7606		Val-Leu
15100	213.196	6.5423
21944	213.222	16.9055			5-tetradecenol, Z
22306	214.051	5.8411
18899	214.056	12.9443
21790	214.069	1.4083
19591	214.108	3.4192
14190	214.123	9.6365
14993	214.125	13.8144
3419	214.13	1.3567
5074	214.144	2.5758
20515	214.144	7.1876
10580	214.18	11.5693
21069	214.18	6.2308
9948	214.18	7.34
5422	214.216	15.9694
292	214.253	13.4747
7916	214.253	14.2703			Tetradecylamine
19340	215.023	5.1708
18995	215.063	9.565
5740	215.068	8.3528
17651	215.103	2.388
17045	215.103	4.0762
771	215.118	8.5086			2-Acetyl-1,2,3,4-Tetrahydro-Β-Carboline
5439	215.126	7.1645
14209	215.139	8.1818			Dethiobiotin
15015	215.139	6.5835			Prolylvaline
2922	215.139	5.8774			Prolylvaline
3630	215.139	2.2545		Pro-Val
14393	215.139	3.5994		Val-Pro
22406	215.139	5.1227			Prolylvaline
23378	215.139	4.2732
20154	215.154	7.3749			4-Amino-3-Ethyl-2-Propylquinoline
2313	215.176	1.3153
22241	215.176	2.8087
5324	215.201	17.058
15045	216.088	3.5492			Kinerase
17673	216.1	8.5672
15979	216.102	5.8987
5026	216.123	1.4169
2950	216.139	10.7726
19179	216.159	10.1781
986	216.16	3.5511
2453	216.16	5.5181
666	216.16	4.9039
22038	216.175	9.7757
11432	216.196	11.1113			12-aminododecanoate
2671	216.207	1.0979
4035	216.923	1.1437
10518	217.048	10.5303
17810	217.065	5.3788
14732	217.069	1.2739
6054	217.07	7.2089
13620	217.072	4.7272
13665	217.095	7.0692
1867	217.095	6.1827			1H,2H,3H,4H,9H-pyrido[3,4-b]indole-4-carboxylic acid
1276	217.097	6.7038		4-(sec-butoxy)benzoic acid
2376	217.097	8.4313			N-Acetyl-Beta-Oxotryptamine
69	217.105	5.4742
22900	217.107	8.2191
15690	217.119	1.4535		Thr-Pro
14131	217.134	6.8527
5519	217.155	6.8525			Valylvaline
11223	217.155	2.8607		Val-Val
15511	217.191	2.5746			N-Boc-1,6-diaminohexane
23234	217.195	18.6547		Palmitic acid alkyne
7933	218.018	7.5604
7213	218.079	6.5431
5069	218.081	11.9394
13606	218.081	10.1114
4926	218.082	8.846
2498	218.09	2.6237
791	218.139	1.5847
1083	218.154	7.0681
14720	218.154	8.8998
16035	218.191	10.4732
16211	218.191	9.8752
7367	218.548	5.6299
3446	219.027	1.1965
2454	219.074	5.754
2571	219.074	6.4608
8847	219.075	9.3289
17676	219.08	3.7568
7887	219.095	11.3068
11002	219.099	8.5067
4036	219.111	6.813			methyl N-[2-(1H-indol-3-yl)ethyl]carbamate
2234	219.113	7.4073			3-Benzyl-6-methyl-2,5-piperazinedione
5722	219.123	8.8727
17781	219.134	4.6281		Ser-Ile
11171	219.134	3.2439		Ser-Ile
8837	219.136	11.321
9125	219.149	12.7003
13808	219.212	15.346		16-Hydroxyhexadecanoic acid
18598	219.583	9.8496
10086	220.059	2.8289
15642	220.079	6.9041
10166	220.095	5.8311
10286	220.097	8.1733
2370	220.1	2.66
1737	220.119	4.7979	Pantothenic acid
3126	220.119	8.8146
705	220.119	5.7713		trans-Zeatin
16789	220.132	16.0084
14624	220.133	5.6601
14411	220.133	9.7677
8040	220.133	6.8868
14372	220.137	2.2684
3322	220.17	7.8629
9627	220.206	13.998
7459	220.589	7.2684
2061	221.012	8.5626
17942	221.071	11.5949			Canthin-6-one
6352	221.079	6.6796
21954	221.081	13.4249
18340	221.09	5.6648
3962	221.091	2.5084			5-Hydroxy-L-Tryptophan
3681	221.092	4.1578			5-Hydroxy-L-Tryptophan
7977	221.096	11.6046		Benzyl cinmate
7376	221.103	6.8624
2398	221.104	6.3195
17343	221.115	7.9973
6861	221.117	15.5246			3-prenyl-2,4-dihydroxyacetophenone
19776	221.117	14.9305			3-prenyl-2,4-dihydroxyacetophenone
13582	221.118	9.6438
20027	221.129	7.8946			N-[2-(2-acetamidophenyl)ethyl]acetamide
8593	221.133	14.5516
1878	221.165	6.8506
2293	221.186	1.2852
16004	221.19	13.614		Bisabolol oxide A
1068	222.02	1.275			choline sulfate
18295	222.04	13.9732
6302	222.049	11.0188
11285	222.056	10.6659
8177	222.074	8.7366
8948	222.074	4.4032
21913	222.099	6.7807		7,8-Dihydro-L-Biopterin
7371	222.11	2.0745
9799	222.113	6.9444
2883	222.113	8.9367			Methyl 2-(Acetylamino)-3-Phenylpropanoate
2502	222.113	5.9009
3989	222.113	10.6205			Carbofuran
10128	222.113	7.6922
19555	222.124	2.3049
8599	222.148	10.4931
5736	222.149	5.9122
14256	222.149	7.0631
9002	222.183	15.2557
13497	222.185	16.1883
2738	222.185	7.5497
584	223.064	11.9939		Cyclotrisiloxane, hexamethyl-
15350	223.064	16.1703
15205	223.064	14.4042			5,5'-Dimethyl-2,2'-Bipyridine
22380	223.075	1.3033
18179	223.094	1.2598		Cytosine
17342	223.095	7.1653
5728	223.095	6.2699
17367	223.095	8.7199			1,3-Benzenedipropanoicacid
11907	223.1	7.988
6562	223.105	7.9234
1705	223.108	5.2381
5714	223.108	5.8492		Gly-Phe
5952	223.112	14.308			4''-Methylchalcone
8970	223.131	8.5688
8573	223.131	9.0836
15039	223.133	11.7648
16042	223.144	1.3906
22117	223.169	12.4668
9759	223.181	13.222
5298	223.206	17.681			2,6,10,10-tetramethyltricyclo[7.2.0.0²,5]undecan-6-ol
8815	223.23	14.832
5617	223.989	1.0869
6204	224.047	11.0188
4175	224.092	6.254		N-Acetyl-L-tyrosine
3416	224.113	1.1759			N-Acetylgalactosaminitol
1036	224.126	2.6061
1936	224.127	9.0942
13593	224.128	10.237
20357	224.128	5.9398
8626	224.129	6.7684
9197	224.129	8.1859
1067	224.165	7.7917
16792	224.165	8.4665
19452	224.176	1.2915
392	224.186	9.238
14735	224.238	13.7177
21063	225.055	6.5948
2616	225.073	5.9627
14021	225.076	9.7149
20350	225.084	2.3719
8156	225.091	13.9239			Dibenzoylmethane
14518	225.1	9.3537
2147	225.102	13.2405
10890	225.11	10.9353
4133	225.124	6.4365
1096	225.139	9.9261			1-methyl-4-propyl-9H-beta-carbolin-2-ium
18448	225.146	12.7407
14007	225.149	14.8414
20933	225.16	5.7849			Prolyldiketopiperazine B
13198	225.196	12.5025
13521	225.197	10.7346
4396	225.222	18.5417			2-Pentadecyn-1-ol
14226	225.222	16.0831			2-Pentadecyn-1-ol
17107	226.069	1.4259
18002	226.09	7.7841
5663	226.108	3.452
3614	226.123	12.891		6-Benzylaminopurine
8383	226.132	10.5288
13008	226.144	9.3621
1679	226.144	6.2847
7857	226.144	7.2321
1882	226.155	1.4137
2251	226.155	2.5961
248	226.159	16.7564
14561	226.159	9.1174			Diphenethylamine
100	226.18	11.6478
3557	226.18	7.1156
22004	226.18	5.442			1-[6-(2-oxobutyl)piperidin-2-yl]butan-2-one
15416	226.217	10.4333
19836	226.253	14.1177			2-Butyl-5-heptylpyrrolidine
946	226.952	19.3303
1089	226.952	1.1285
10168	226.952	18.5521
13857	226.952	17.584
18086	227.038	10.1548
18768	227.076	12.3287
3660	227.082	8.0242			1-Methyl-9H-Beta-Carboline-3-Carboxylic Acid
2480	227.103	5.1848		PyroGlu-Pro
13617	227.118	8.1877
11258	227.125	1.2214
5727	227.126	11.0552
327	227.139	7.0004		cyclo(L-Leu-L-4-hydroxy-Pro)
1038	227.139	6.4868		Cyclo-(L-Pro-4-OH-L-Leu)
23403	227.139	5.4688
8461	227.14	7.6267
17562	227.155	8.0299			4,4'-Methylenebis(2-Methylaniline)
10648	227.165	13.8103			methyl (10E)-12-oxo-10-dodecenoate
17667	227.175	6.3188			Cyclo-leu-leu
7559	227.176	9.6807		Ile-Leu
8676	227.176	9.0836			Cyclo-leu-leu
8201	227.201	16.8406		Myristoleic acid
12598	227.212	10.3572
14813	228.012	10.9629
7400	228.063	6.5996
18112	228.102	14.8971
7079	228.123	7.1257
19423	228.123	6.0413
4095	228.135	5.5506			2-[(2R,5R)-5-(butan-2-yl)-3,6-dioxopiperazin-2-yl]acetamide
14528	228.138	7.6881
4013	228.146	1.4311
20560	228.16	8.123
10308	228.16	3.8391
4077	228.171	3.0081
14192	228.175	10.365
2778	228.175	6.8093
14449	228.175	10.5468
192	228.196	12.523
8418	228.232	17.6714
1185	228.232	12.393			N-ethyldodecamide
19595	228.232	11.3706
494	228.232	17.0273			Myristamide
19873	228.232	10.7989
7954	228.244	13.6095
16209	228.268	14.5473
9692	228.269	13.5315
1977	229.041	7.0955
1073	229.043	12.0268			Indothiazinone
2754	229.051	6.7596
3926	229.059	2.8344
741	229.08	9.806
7341	229.082	2.5068		Deoxyuridine
1868	229.101	7.2087
1417	229.102	2.8076
10802	229.105	6.6576
12441	229.112	8.7862
1514	229.119	1.3699			Prolylhydroxyproline
2424	229.119	6.1708
22593	229.13	1.235
22909	229.141	8.4008
1	229.141	9.2344
2165	229.155	6.8126		Leu-Pro
13609	229.155	7.3106		Pro-Leu
2356	229.155	5.2935		Pro-Ile
3697	229.155	4.4056			L-prolyl-L-leucine
7344	229.155	6.072		Leu-Pro
11255	229.155	2.993			Isoleucylproline
2470	229.191	1.2131
22098	229.191	3.8939
16993	229.192	4.9654
1493	229.216	17.9422		Isomyristic acid
7462	230.079	7.1124
3968	230.079	8.0549
2288	230.096	1.3928		Ergothioneine
4915	230.117	9.9638
3473	230.117	1.009
12896	230.118	7.8473
2573	230.118	10.9982
5138	230.139	1.6271
14650	230.154	6.5448
5258	230.175	7.2932
729	230.175	6.412
11576	230.175	10.8026			Decanoylglycine
2322	230.187	2.2762
13116	230.191	10.7869
14336	230.212	12.2628
2482	230.223	1.1018
539	230.248	12.9604
8066	230.248	13.5396			Lauramine Oxide
2638	231.059	11.4995
8638	231.078	14.1037
10241	231.1	11.1387
2060	231.112	7.0376
1175	231.113	7.5618			Tetrahydroharman-3-carboxylic acid
10043	231.113	9.2413
6216	231.121	6.5816
1586	231.134	1.3913
22378	231.134	5.1403
16418	231.135	3.4956
125	231.136	11.1941
14159	231.15	7.4466
3734	231.171	1.3388
18117	231.171	7.7579		Val-Ile
7328	231.171	5.5635		Leu-Val
9181	232.034	8.8495
16583	232.079	7.113
18957	232.09	8.2661
20394	232.095	3.2995
2269	232.096	8.8711			3-(4-Hydroxy-2-Methyl-Quinolin-3-Yl)-Propionic Acid
2966	232.101	4.4568
3063	232.132	6.4126
19663	232.133	11.8497
14151	232.133	10.1386
15961	232.134	8.6737
3709	232.137	10.8691
19390	232.145	6.8357
889	232.154	1.4177
1213	232.155	2.382
14526	232.17	7.6881
17542	233.059	5.1436
1155	233.061	1.6388
18533	233.07	6.8588
9063	233.077	8.2071			Benzenepropanoic Acid,2,3-Dimethoxy-
2404	233.079	9.5729
13364	233.079	7.4643
2585	233.09	6.8117
4070	233.09	4.6567
22322	233.092	7.7646
6055	233.094	14.6461
20551	233.111	8.3572
3604	233.113	1.2937			2-amino-5-(1-carboxypropylamino)-5-oxopentanoic acid
11047	233.115	10.7476
5118	233.115	7.2995
8422	233.116	9.8099
1136	233.126	7.947
1454	233.126	8.078
1297	233.13	13.029
2668	233.132	8.3064
5846	233.133	11.56			1,6-diphenylhexatriene
2723	233.15	6.2632		Thr-Leu
7452	233.15	3.8724		Thr-Leu
8986	233.166	10.0462
9343	234.033	8.6967
17297	234.074	4.6863
3834	234.085	2.5263
1804	234.098	2.3837			9-(2,3-Dideoxy-beta-L-glycero-2-pentenofuranosyl)-9H-purin-6-amine
1678	234.099	1.4434
17773	234.108	1.2838			Alanyl-glycyl-serine
2289	234.116	4.0252
2328	234.116	4.863
1646	234.135	6.4623
14168	234.147	10.3389
8050	234.162	14.5199
22236	234.185	8.3544
14632	234.186	13.6136
16116	234.186	11.8208
15645	234.65	5.597
2394	234.952	3.6568
5630	235.055	6.8244
5217	235.083	3.0692
17972	235.087	12.4579
19345	235.087	13.7382
1263	235.087	9.5825
20169	235.09	10.7787
7975	235.095	6.6273
12200	235.095	10.1982
1603	235.098	9.0673			6-phenyl-3-pyridin-2-yl-1,2,4-triazine
9416	235.107	8.3551
4176	235.108	6.1281			Cyclo(Phe-Ser)
10363	235.108	5.3659			cyclo(L-Tyr-L-Ala)
949	235.119	1.4005		His-Pro
1465	235.119	2.054		His-Pro
2579	235.119	7.0774
9314	235.131	10.551
8887	235.131	9.823
3543	235.144	6.3978
4409	235.144	8.4965
9670	235.148	15.1843			[18]annulene
2280	235.165	1.3015		Betaine
6285	235.169	15.3635
3057	235.181	7.2348
3227	235.181	6.2796
13686	236.082	8.1709
10430	236.09	7.9129
4764	236.092	9.0227
3346	236.114	5.4395
17380	236.128	8.4899
3420	236.128	6.9701
1572	236.128	6.0616
13565	236.129	11.7456
16748	236.129	10.8055
2139	236.162	11.5554
3299	236.165	7.2408
2930	236.165	6.6787
14146	236.165	6.1522			1-(4-methoxyphenyl)-N-methyl-N-[(3-methyloxetan-3-yl)methyl]methamine
18624	236.575	10.2396
1838	236.641	14.6686
2570	237.076	13.0232
3954	237.087	2.1267
4065	237.087	7.4398		Formylkynurenine
23406	237.088	4.3772		Formylkynurenine
2531	237.099	5.3371
2457	237.099	6.4557			Didanosine
17357	237.11	10.0773
904	237.11	8.1554
3280	237.11	6.9892
22833	237.11	7.551
2898	237.124	6.1861
4102	237.135	2.1735
8245	237.146	9.7344
6683	237.147	8.7845
9252	237.16	6.7978
20203	237.17	7.7387
20149	237.196	7.2711
14165	237.197	14.1028
14264	237.221	17.3309		Palmitelaidic acid
1129	237.222	18.3177
12924	237.222	15.4663		Palmitelaidic acid
7395	238.057	5.4615
19236	238.061	9.814
15933	238.094	2.5464		6-Biopterin
10196	238.107	6.7323
19398	238.119	5.0532
3340	238.142	5.2295
9174	238.142	9.9848
1458	238.144	11.3467
7728	238.144	6.8979
19768	238.155	3.7571
9548	238.178	11.1042
14269	238.18	8.7127
21788	238.608	14.6029
1673	239.034	2.6707
2305	239.079	8.493
5737	239.089	8.2492
13732	239.091	6.7319			3,4,5-Trimethoxycinnamic acid
3	239.106	1.1796		4-(2-Hydroxyethyl)piperazine-1-ethanesulfonic acid
7903	239.107	13.6457		4-Methoxychalcone
3444	239.118	8.2764
13293	239.127	9.5832
6403	239.149	6.253
706	239.155	10.7315			1-(3-methylbutyl)-9H-pyrido[3,4-b]indole
19185	239.176	7.5533
1212	239.237	19.3906			9-hexadecel
7788	239.248	11.7798
3415	239.584	6.6678
5896	239.665	16.8578
17165	240.069	10.5164
4936	240.102	10.5921		7-Hydroxy-2-acetylaminofluorene
22110	240.109	2.502		7,8-Dihydro-L-Biopterin
860	240.114	7.7246		N-Formylvarenicline
7920	240.123	7.6402
9241	240.123	6.2756
3347	240.135	1.3902
15138	240.138	12.393
14522	240.15	8.8467
8014	240.16	10.9046
13624	240.16	5.3219
3410	240.16	6.4665
8239	240.208	9.2396
10357	240.232	13.7643
5315	240.232	16.673
2795	240.232	11.1269
9344	240.244	13.0383
20963	240.269	14.6289
15180	240.673	10.729
1204	241.031	1.1876	DL-Cystine
3291	241.069	8.5907
3785	241.098	8.0982		.beta.-Carboline-1-propionic acid
1757	241.105	9.2215
5550	241.105	8.653
8104	241.105	6.631
23135	241.119	5.8479
14014	241.133	10.0379
14900	241.133	11.275			2,3,6,7,12,12b-hexahydro-1H-indolo[2,3-a]quinolizin-4-one
14613	241.134	9.3254			1-Ethyl-1,3-diphenylurea
14996	241.134	7.0903
8472	241.141	11.8117
8989	241.142	8.0249
4123	241.155	6.603
9283	241.178	13.6585
13920	241.191	6.1747
8306	241.204	10.0309
5287	241.216	17.6922		Methyl myristoleate
11107	242	1.0954
21601	242.07	8.6885
2473	242.1	4.9177
15090	242.102	6.0541
14367	242.115	9.7677
7947	242.139	1.3882
19669	242.139	9.0577
19453	242.139	6.4236
6674	242.139	5.9785
4106	242.15	6.3585
14174	242.155	14.0388
931	242.175	6.9365
3538	242.187	5.6092
19481	242.248	12.2029
2577	242.248	17.8158
14600	242.249	13.2124
4376	242.284	14.189
7801	242.284	14.9254
541	242.926	1.1328
16617	243.08	5.0862
2550	243.086	6.2981
804	243.088	9.2038		Lumichrome
18096	243.095	10.2998
4058	243.098	2.4707
3472	243.098	4.761		Thymidine
10473	243.111	6.8459
8817	243.112	8.0158
23105	243.113	12.6474
7203	243.121	7.0166
2367	243.134	7.0944			Pyroglutamylleucine
10393	243.139	13.1423			Benzene, 1-methoxy-3-[2-(4-methoxyphenyl)ethyl]-
14825	243.149	6.5285
14399	243.153	12.2886
3586	243.171	5.6002		Leu-Leu
16239	243.171	7.7594
2208	243.171	6.7566
16359	243.171	4.3916
2415	243.207	1.3041
15949	243.207	5.5771
7682	243.211	14.6851
4298	243.232	18.5475			Pentadecanoic Acid
7731	243.28	11.1578
7338	243.553	6.0458
5349	243.992	11.6935
5294	244.079	1.2814
9946	244.08	9.8901
3361	244.093	1.3885		cytidine
509	244.094	9.0089
13695	244.095	10.6306
13655	244.1	8.1789
19445	244.106	2.3049
3575	244.131	1.2576
13510	244.131	10.5903
4134	244.133	14.2263
9240	244.154	7.4847
9423	244.17	13.0124		HHQ
195	244.191	11.6452			N-Undecanoylglycine
7976	244.206	11.1969
2511	244.238	1.1249
7800	244.264	13.3529
20964	244.264	14.2648
4822	244.638	14.6103
1415	244.638	13.3204
10054	245.07	5.9864
17867	245.075	7.6138
1443	245.077	1.4017		Ribavirin
1850	245.077	2.0794		Ribavirin
1559	245.079	12.6328
2529	245.079	8.5656
6581	245.094	14.4295
4104	245.096	6.0248
23269	245.096	7.4186			1-Hydroxychrysene
17628	245.096	8.3944		Glu-Pro
2078	245.096	4.8472
4167	245.099	6.3724
5657	245.102	7.8637
14086	245.108	14.0306			1-phenyl-9H-pyrido[3,4-b]indole
5877	245.115	13.9685	L-Prolyl-L-glutamic acid
276	245.115	9.2425
5678	245.115	11.6364
17420	245.129	7.5283
2359	245.129	8.0486			1-Ethyl-2,3,4,9-Tetrahydro-1H-Beta-Carboline-3-Carboxylic Acid
760	245.129	8.5936		Phe-Pro
13877	245.132	2.7526
13902	245.132	1.4781
7472	245.15	5.0793
2336	245.15	1.4219
7308	245.15	3.2647
22469	245.15	5.967
10507	245.152	12.5942
14888	245.152	12.0399
14130	245.165	7.9482			Tryptamine isovalerate
7318	245.186	6.6983		Ile-Ile
23381	245.186	8.484			Leucylleucine
3491	245.616	15.2905
1482	245.646	14.6634
7817	246.013	6.8969
18386	246.081	13.2429
1381	246.116	6.1955
19616	246.124	5.2089			4-Acetamidoantipyrine
19455	246.124	7.4972
1109	246.134	2.1427
23328	246.134	6.0667
18010	246.145	4.0657
1435	246.153	11.8968
19441	246.16	7.9388
19601	246.16	7.0556
8489	246.17	8.1209
14603	246.185	9.6897
14486	246.185	7.792
13754	246.242	11.3326
1205	247.049	1.9167
2774	247.058	9.7084
19368	247.086	10.5421
4505	247.087	8.595
2975	247.093	1.3978
3983	247.108	8.5285	N-acetyl-D-Tryptophan
7369	247.109	5.8706			L-Methionine, L-prolyl-
13907	247.112	7.7601
18529	247.128	12.7407
15929	247.129	3.132		Glu-Val
17780	247.129	5.8599		Val-Glu
22599	247.141	1.261
7578	247.145	9.239		cyclo-(Val-Phe)
7531	247.147	8.6977
22679	247.181	6.6401
6862	248.011	6.9122
14211	248.02	13.6503
17238	248.09	5.8133
8969	248.105	12.8825
16812	248.124	1.3384			threonylglutamine
19604	248.126	9.3958
13255	248.128	8.4001
2282	248.131	5.8598
19408	248.139	5.8331		Pyroxamide
14654	248.15	1.4992
16328	248.151	7.186
11895	248.163	13.5777
16028	248.165	10.7853
11931	248.167	6.9154
22028	248.201	8.3023
2714	249.085	5.162
8135	249.089	12.0598
9444	249.089	12.5702
8331	249.11	7.8795			3,4-Methylenesebacic Acid
8634	249.11	9.6806
762	249.122	6.9078
7507	249.125	6.5114
5399	249.127	7.9105
17661	249.157	6.2516
14302	249.16	7.1163
7134	249.183	13.5571
8046	249.185	15.2201
2663	249.196	1.397
19030	250.035	10.0072
132	250.075	12.3336
2002	250.094	4.8318
19035	250.097	11.1246
8083	250.106	7.1337
8100	250.106	6.5334
2509	250.111	1.574
1028	250.112	11.3435
2364	250.13	6.3928
17647	250.144	10.7099
694	250.144	6.7004
12020	250.16	11.0302
144	250.178	12.5215
19075	250.18	13.3346
14454	250.181	7.4824
8769	250.214	17.2555
15779	250.637	6.05
385	251	13.2441
20525	251.02	14.103
995	251.025	12.0128
23325	251.026	5.3909
9532	251.047	17.7232			4-Benzoylanisole
8057	251.047	9.1877			4-Benzoylanisole
3838	251.064	2.5014
20364	251.07	1.3609
16712	251.078	5.2727
241	251.089	7.326
3036	251.101	6.0195
22279	251.103	7.7646
14956	251.114	6.1285
2662	251.114	7.1771
5379	251.126	11.8945
3680	251.126	7.6474
3873	251.128	8.4782
3670	251.139	6.7721
4046	251.151	3.214			Cyclo(his-leu)
23419	251.151	5.1571
14305	251.155	8.7277
13077	251.163	13.9599
8115	251.163	11.0909
16530	251.163	12.7801
9959	251.2	13.5546		Sclareolide
6215	251.201	15.7806		Sclareolide
14490	251.212	15.6674
3595	251.237	18.9374			Civetone
14178	251.237	17.8569			(8Z,11Z)-Heptadecadiel
431	251.576	12.1837
2422	252.078	1.3842
4795	252.087	9.2654
700	252.109	3.0491	5'-Deoxyadenosine
3800	252.109	1.6079			Desoxyadenosin
15927	252.109	4.572		Cordycepin
8432	252.122	6.5151
8752	252.123	7.4379		N-Acetyl-L-tyrosine ethyl ester
17449	252.123	9.8958
15239	252.124	11.3524
19443	252.135	6.2237
9452	252.157	10.8042
5463	252.157	6.3663
16041	252.158	8.732
2481	252.16	12.0693
6659	252.16	16.4532
2933	252.171	5.9451
22248	252.196	9.5936
1624	252.635	12.0527
601	252.997	13.2409
3207	253.041	11.4973
87	253.084	12.3327
5659	253.084	7.8637
7312	253.094	3.5905		Inosine, 2'-deoxy-
13278	253.105	8.6625
2560	253.119	5.9406		Ser-Phe
15752	253.119	5.2836		Ser-Phe
783	253.134	8.6485
17277	253.142	9.2975
17438	253.142	7.1392
2116	253.17	11.5473
8262	253.178	13.8287
19177	253.191	8.6182
2698	253.191	6.2671
14710	253.192	13.1202
6897	253.214	17.5119
9997	253.216	13.9059
614	253.264	14.337
1502	253.643	13.2003
1026	254.079	8.8972
10381	254.116	11.8935
20476	254.118	6.4601
1573	254.121	7.4769
19580	254.127	7.0294
14658	254.139	5.6608
9984	254.145	6.8199
3391	254.151	1.7744
3979	254.161	1.4857			2-{3-[(3R,8aR)-1,4-dioxo-hexahydropyrrolo[1,2-a]piperazin-3-yl]propyl}guanidine
3608	254.161	4.1208			2-{3-[(3R,8aR)-1,4-dioxo-hexahydropyrrolo[1,2-a]piperazin-3-yl]propyl}guanidine
3917	254.161	3.1235			2-{3-[(3R,8aR)-1,4-dioxo-hexahydropyrrolo[1,2-a]piperazin-3-yl]propyl}guanidine
13964	254.175	13.5103		N-3-Hydroxydecanoyl-L-homoserine lactone
16012	254.176	7.1263
10062	254.187	9.1189
19878	254.212	14.4399
10623	254.212	13.2066
1110	254.248	13.1077
1839	254.248	17.4468			N-(3-methylbutyl)undec-10-emide
22295	254.284	14.8267
20956	254.285	15.6426		(2R,6R)-2-methyl-6-undecylpiperidine
16408	255.054	8.4464
18946	255.056	9.565
20520	255.077	11.4253		Chrysophanol
15602	255.086	8.4962			Dimethyl 4,5-dimethoxyphthalate
2848	255.095	8.9906
690	255.098	1.3346
1348	255.111	7.6548
18506	255.114	8.4698
13130	255.121	5.6737
12165	255.155	12.9591
8566	255.16	12.2247
7437	255.171	7.1965
14634	255.212	12.8603
910	255.232	18.3099		Palmitelaidic acid
14219	255.232	17.2774		Palmitelaidic acid
9992	255.233	15.3393		Palmitelaidic acid
5406	256.01	8.8464
13701	256.098	4.0152
3310	256.134	8.3016
4117	256.177	4.3462
13972	256.191	13.7183		N-Decanoyl-DL-homoserine lactone
5421	256.191	7.8146
8099	256.202	8.9014
10812	256.227	14.27
825	256.264	18.7333			Hexadecanamide
19491	256.264	12.5409
21189	256.264	14.7946
1165	256.264	13.6848
7616	256.275	14.9879
9514	256.3	15.1211
121	256.3	14.4091
7319	256.821	1.188
2399	257.045	2.6541
18435	257.075	1.2946
3476	257.102	6.9072
5229	257.111	14.431
3271	257.126	8.5007
826	257.133	5.0052
17956	257.136	8.986
2291	257.147	1.3306
15229	257.15	6.046
14249	257.165	7.1423
14162	257.169	13.4319
16972	257.186	7.5908
2897	257.187	6.8115
23401	257.187	8.5881
16011	257.223	6.201
6404	257.226	17.687			2-ethenyl-2,4b-dimethyl-8-methylidene-3,4,4a,5,6,7,8a,9-octahydro-1H-phenthrene
809	257.248	19.3659	Palmitic acid
8734	257.296	11.0607
22983	258.008	13.9158
23004	258.008	13.2396
14481	258.069	10.1832
14493	258.07	7.48
15534	258.11	6.9796
4758	258.112	10.6493
14088	258.112	9.4115
10206	258.125	7.418
9958	258.134	2.8573
15720	258.145	1.462			L-alanyl-L-alanyl-L-proline
16032	258.148	11.7477
13980	258.17	6.4413
2687	258.207	5.8831
11598	258.279	14.8714
10312	258.28	13.4277
19896	258.658	10.2017
5445	259.026	1.245
13804	259.075	1.6555
16677	259.089	7.8258
1202	259.093	3.9463		3-Methyluridine
18748	259.108	6.4649
1285	259.115	6.1507
1601	259.115	6.9718
709	259.123	10.22			Marinoquinoline C
15410	259.129	13.2644
22031	259.144	11.9729
845	259.145	7.8361
2875	259.151	7.7412
11257	259.166	4.2009
15016	259.166	5.6595
3263	259.166	6.9218
10919	259.168	13.0709
9887	259.168	14.1701
18980	259.18	13.3346			4-tert-butyl-1-ethenyl-1-methyl-2-(prop-1-en-2-yl)cyclohexane
14129	259.181	8.4538			3-(1H-indol-3-yl)-N-(3-methylbutyl)propamide
8890	259.191	20.6915		Dibutyl adipate
22042	259.227	16.9119			3-hydroxypentadecanoate
13832	259.633	17.0054
17578	259.988	11.6893
18999	260.018	13.0424
9284	260.09	6.4813
22326	260.103	7.4011
2894	260.124	1.4276
1874	260.126	11.3342
7980	260.126	7.8183
3414	260.128	9.5521
9139	260.128	8.757
20561	260.132	5.7577
20000	260.138	8.7454
3946	260.161	1.3548
14570	260.186	5.6184
907	260.186	6.2819
18941	261.051	15.2057
18438	261.052	12.4047
21605	261.073	7.2057
88	261.088	1.1803
6043	261.089	13.7547
20670	261.091	5.9919			4-methylsulfanyl-2-[[(2R)-5-oxopyrrolidine-2-carbonyl]amino]butanoic acid
8316	261.099	7.3391
19206	261.102	10.4121
18450	261.103	13.9707
436	261.11	11.4746
659	261.124	7.4847		cyclo(Phe-4-Hyp)
947	261.124	6.7346
9897	261.124	8.2512		cyclo(L-6-Hyp-L-Phe)
7813	261.125	15.5115
15264	261.126	5.707
3672	261.131	6.2654
15487	261.144	13.9924
4303	261.145	5.9446		Glu-Leu
7571	261.16	9.8945		cyclo-(Leu-Phe)
14298	261.16	6.4668
3448	261.184	13.709
16417	261.196	6.1647
14907	261.197	7.9169
2082	261.222	14.7192			4-(5,5,8a-trimethyl-2-methylidene-decahydrophthalen-1-yl)but-2-el
2044	261.641	12.0559
4136	262.035	13.5242
14315	262.036	14.3744
[truncated: 4,419 more rows]
